# Supplementary material for: An arc fault diagnosis algorithm using multiinformation fusion and support vector machines
Source: R Soc Open Sci. 2018 Sep 19;5(9):180160. doi: 10.1098/rsos.180160 (PMC6170584; doi:10.1098/rsos.180160)
Supplement: Fig.6_data [file rsos180160supp4.xlsx]

## Sheet: Sheet1
Fig.6(a)	Stable operation	Arc faults	Starting process		Fig.6(b)	Stable operation	Arc faults	Starting process		Fig.6(c)	Stable operation	Arc faults	Starting process
Cycle number/N	Current waveform slope	Current waveform slope	Current waveform slope		Cycle number/N	Current waveform slope	Current waveform slope	Current waveform slope		Cycle number/N	Current waveform slope	Current waveform slope	Current waveform slope
1	0.0631579	0.0737705	0.0121212		1	0.0578512	0.0725806	0.0176471		1	0.064	0.204545	0.012201
2	0.0543478	0.0967742	0.0113208		2	0.0610687	0.0714286	0.0153846		2	0.0576132	0.166667	0.0192611
3	0.0638298	0.081761	0.0130435		3	0.0569106	0.0925926	0.0181818		3	0.0600707	0.186667	0.0136364
4	0.0531915	0.0689655	0.0181818		4	0.0526316	0.0552486	0.0129032		4	0.0521173	0.171642	0.0156028
5	0.0555556	0.149254	0.0136364		5	0.037594	0.0597015	0.0230769		5	0.0645161	0.217391	0.0137143
6	0.0576923	0.145695	0.0136364		6	0.0458015	0.0633803	0.0142857		6	0.0543478	0.0789474	0.0138728
7	0.0549451	0.205128	0.0109091		7	0.056	0.046875	0.0133333		7	0.0533808	0.197368	0.0162791
8	0.0588235	0.105263	0.0177778		8	0.0454545	0.0544218	0.012766		8	0.0704225	0.0689655	0.0171204
9	0.0568182	0.192	0.0166667		9	0.0441176	0.114286	0.0121212		9	0.0756303	0.133333	0.0102941
10	0.0549451	0.120879	0.0136364		10	0.048	0.0588235	0.0108108		10	0.0676692	0.2	0.0127389
11	0.0594059	0.176471	0.0129032		11	0.0703125	0.0710059	0.0133333		11	0.0789474	0.09375	0.0122222
12	0.0582524	0.169492	0.0136364		12	0.0551181	0.0692308	0.0230769		12	0.0851064	0.233333	0.0136364
13	0.0526316	0.2	0.0115385		13	0.048	0.146893	0.0142857		13	0.0608365	0.218487	0.0165385
14	0.049505	0.116883	0.0173913		14	0.0610687	0.0757576	0.0133333		14	0.0671141	0.142857	0.0115607
15	0.0549451	0.172414	0.01		15	0.0441176	0.213542	0.0133333		15	0.0561798	0.0833333	0.0111111
16	0.049505	0.150794	0.015		16	0.0518519	0.0620155	0.0148148		16	0.0572519	0.14346	0.0161074
17	0.05	0.186667	0.0115385		17	0.059322	0.068323	0.016		17	0.0526316	0.2375	0.0164557
18	0.0612245	0.0757576	0.015		18	0.0461538	0.0666667	0.0129032		18	0.0668896	0.0963855	0.0171204
19	0.0612245	0.0981595	0.0122449		19	0.0458015	0.0797101	0.01		19	0.0504732	0.135135	0.0157303
20	0.0520833	0.0683761	0.0139535		20	0.047619	0.0804598	0.0117647		20	0.0779817	0.273438	0.0137931
21	0.0537634	0.153061	0.0146341		21	0.057377	0.0875912	0.0193548		21	0.0661157	0.246914	0.0139241
22	0.0537634	0.108696	0.0170213		22	0.0458015	0.0738255	0.0121212		22	0.0923695	0.0714286	0.0154839
23	0.0515464	0.0897436	0.00952381		23	0.0546875	0.0708661	0.0157895		23	0.055336	0.264286	0.0162963
24	0.06	0.135338	0.0139535		24	0.0597015	0.293578	0.0222222		24	0.0535714	0.222892	0.0102703
25	0.0531915	0.162791	0.0166667		25	0.0603448	0.0779221	0.0148148		25	0.0729927	0.181818	0.0171429
26	0.0543478	0.0917431	0.0108108		26	0.0491803	0.0869565	0.0173913		26	0.0614754	0.0769231	0.0146448
27	0.0537634	0.157025	0.0115385		27	0.0546875	0.0914286	0.025		27	0.0555556	0.276316	0.0120482
28	0.0412371	0.1	0.0176471		28	0.0578512	0.0967742	0.0166667		28	0.0458333	0.0930233	0.0149451
29	0.0520833	0.183333	0.0133333		29	0.0666667	0.0652174	0.0133333		29	0.0642857	0.237864	0.0138365
30	0.040404	0.131034	0.0122449		30	0.0542636	0.0538462	0.0117647		30	0.103774	0.318966	0.0193069
31	0.0520833	0.181818	0.00833333		31	0.057971	0.0569106	0.0230769		31	0.0578512	0.151515	0.0171779
32	0.0430108	0.110169	0.0113208		32	0.0483871	0.0538462	0.0230769		32	0.0610687	0.0714286	0.0147239
33	0.0638298	0.174603	0.0097561		33	0.0551181	0.0915493	0.0153846		33	0.0732601	0.244094	0.016185
34	0.0480769	0.115702	0.0133333		34	0.0514706	0.0588235	0.0117647		34	0.0676692	0.0588235	0.011236
35	0.0566038	0.0679612	0.0136364		35	0.0546875	0.0839695	0.025		35	0.0627178	0.186047	0.0172917
36	0.0588235	0.0555556	0.015		36	0.0465116	0.0661765	0.0166667		36	0.0551471	0.111111	0.016338
37	0.0555556	0.0677966	0.0146341		37	0.0551181	0.0816327	0.0125		37	0.0723982	0.31068	0.0113636
38	0.0625	0.12037	0.0122449		38	0.0465116	0.168539	0.0235294		38	0.0894737	0.181818	0.0137158
39	0.0531915	0.145833	0.0102564		39	0.0447761	0.0551724	0.0129032		39	0.0639098	0.107143	0.0137143
40	0.0520833	0.134454	0.0107143		40	0.0569106	0.0638298	0.0148148		40	0.0747664	0.0857143	0.0114943
41	0.0561798	0.169492	0.0153846		41	0.048	0.0671642	0.00952381		41	0.0534351	0.0434783	0.0155556
42	0.0660377	0.167883	0.0122449		42	0.0542636	0.056	0.0105263		42	0.0553746	0.267327	0.0163743
43	0.0555556	0.0652174	0.285714		43	0.046875	0.0748299	0.0129032		43	0.072	0.201018	0.0178947
44	0.0581395	0.1	0.109244		44	0.0465116	0.236515	0.080402		44	0.0664336	0.210884	0.0110429
45	0.0444444	0.171429	0.0618557		45	0.057377	0.0522388	0.0572917		45	0.0673077	0.175258	0.010402
46	0.0531915	0.0686275	0.0526316		46	0.0538462	0.0465116	0.0517241		46	0.0697674	0.322581	0.057971
47	0.0612245	0.223301	0.0480769		47	0.056	0.0785714	0.0519481		47	0.0619835	0.189815	0.0613924
48	0.0531915	0.0673077	0.0721649		48	0.056	0.0833333	0.0544218		48	0.0538721	0.0769231	0.0607477
49	0.0588235	0.0931677	0.049505		49	0.0458015	0.0748299	0.0522388		49	0.0551724	0.241379	0.0555556
50	0.0535714	0.105263	0.0510204		50	0.064	0.0700637	0.047619		50	0.0952381	0.119565	0.0569106
51	0.0618557	0.0955414	0.0606061		51	0.0491803	0.116564	0.0530973		51	0.0562771	0.192308	0.0660377
52	0.0510204	0.072	0.0510204		52	0.0510949	0.0787402	0.0603448		52	0.0714286	0.134615	0.0552995
53	0.0430108	0.143939	0.0444444		53	0.047619	0.0928571	0.046729		53	0.0557276	0.206186	0.0637255
54	0.0625	0.108434	0.0618557		54	0.0546875	0.0536913	0.046729		54	0.0631229	0.0588235	0.0789474
55	0.0510204	0.064	0.0594059		55	0.0551181	0.0661765	0.0666667		55	0.0817844	0.170588	0.0612676
56	0.0618557	0.0683761	0.0625		56	0.064	0.072	0.0549451		56	0.0474576	0.158333	0.0555556
57	0.0574713	0.0666667	0.0594059		57	0.046875	0.307692	0.0666667		57	0.0498084	0.189542	0.061674
58	0.0618557	0.0603448	0.0618557		58	0.0666667	0.0888889	0.0520833		58	0.0639098	0.135135	0.0765027
59	0.0631579	0.0601504	0.0606061		59	0.0569106	0.141975	0.045977		59	0.0582192	0.376344	0.0487805
60	0.0631579	0.0729927	0.0631579		60	0.0522388	0.0625	0.0470588		60	0.0574018	0.138298	0.0483092
61	0.0645161	0.159794	0.0537634		61	0.0431655	0.0890411	0.0641026		61	0.0794979	0.14433	0.0553846
62	0.0537634	0.0673077	0.0679612		62	0.0564516	0.1	0.047619		62	0.102564	0.0555556	0.0662983
63	0.0416667	0.0844156	0.0568182		63	0.0578512	0.292419	0.0506329		63	0.0472973	0.0540541	0.0494505
64	0.0540541	0.130769	0.0571429		64	0.0634921	0.0753425	0.0493827		64	0.0505837	0.0714286	0.0673575
65	0.0510204	0.176991	0.0612245		65	0.056	0.0819672	0.0684932		65	0.0689655	0.362903	0.0436681
66	0.0510204	0.152672	0.0631579		66	0.0495868	0.0538462	0.0666667		66	0.0614887	0.08	0.047619
67	0.0660377	0.118343	0.049505		67	0.047619	0.0629921	0.0506329		67	0.0533333	0.0795455	0.0678733
68	0.0566038	0.0731707	0.0520833		68	0.0555556	0.05625	0.0526316		68	0.0728745	0.0652174	0.0618343
69	0.0560748	0.212121	0.0412371		69	0.0564516	0.0482759	0.0555556		69	0.0561404	0.196429	0.0663265
70	0.0537634	0.182609	0.0645161		70	0.0564516	0.0774648	0.0555556		70	0.0807692	0.0666667	0.0642202
71	0.0721649	0.107843	0.05		71	0.0555556	0.0775194	0.0684932		71	0.0566038	0.05	0.0606061
72	0.0571429	0.0769231	0.0490196		72	0.0472441	0.057971	0.0571429		72	0.0549828	0.327273	0.0578512
73	0.0550459	0.21	0.0510204		73	0.0534351	0.0629921	0.0675676		73	0.0707071	0.295082	0.0600858
74	0.0537634	0.125	0.0659341		74	0.057377	0.0567376	0.0571429		74	0.0798122	0.194444	0.079602
75	0.0679612	0.12782	0.0549451		75	0.0451128	0.0564516	0.0615385		75	0.0724638	0.084507	0.0707071
76	0.0555556	0.140496	0.0707071		76	0.0487805	0.0661157	0.0533333		76	0.056338	0.0943396	0.0686695
77	0.0588235	0.078534	0.0693069		77	0.0655738	0.326409	0.0571429		77	0.0521173	0.0689655	0.0646766
78	0.0416667	0.112069	0.0576923		78	0.0530303	0.072	0.0588235		78	0.0655738	0.142857	0.0621762
79	0.0510204	0.157025	0.0729167		79	0.0465116	0.0522388	0.0588235		79	0.0622837	0.142857	0.0600858
80	0.0505051	0.0970874	0.0588235		80	0.0542636	0.0694444	0.0540541		80	0.0607143	0.194444	0.0627451
81	0.0679612	0.138365	0.0537634		81	0.046875	0.0592593	0.0526316		81	0.0734694	0.0923077	0.0648148
82	0.0673077	0.097561	0.0510204		82	0.0454545	0.0583942	0.0547945		82	0.057971	0.0862069	0.0646766
83	0.0561798	0.0866142	0.0515464		83	0.0472441	0.107143	0.0615385		83	0.0666667	0.142857	0.0636364
84	0.0736842	0.12	0.0571429		84	0.0522388	0.0777778	0.05		84	0.078341	0.226415	0.05
85	0.06	0.166667	0.0631579		85	0.0461538	0.064	0.0714286		85	0.0658436	0.170732	0.0777778
86	0.0689655	0.16129	0.0425532		86	0.0472441	0.057971	0.0655738		86	0.047619	0.147541	0.0883534
87	0.0510204	0.0833333	0.0490196		87	0.0495868	0.0551181	0.0447761		87	0.0634921	0.298077	0.0829412
88	0.0485437	0.127451	0.06		88	0.048	0.0898876	0.0428571		88	0.0658915	0.21875	0.0660377
89	0.0631579	0.149123	0.0462963		89	0.0634921	0.0588235	0.0555556		89	0.052459	0.0740741	0.053719
90	0.0520833	0.0990991	0.049505		90	0.0661157	0.142012	0.0454545		90	0.0819672	0.17757	0.0707547
91	0.049505	0.0555556	0.0612245		91	0.048	0.0628931	0.0588235		91	0.0661157	0.215909	0.0646067
92	0.0421053	0.0618557	0.0566038		92	0.057377	0.0551181	0.0555556		92	0.0606936	0.247934	0.0689655
93	0.049505	0.167832	0.0638298		93	0.046875	0.10241	0.0634921		93	0.0562249	0.108108	0.0677291
94	0.0594059	0.129032	0.06		94	0.0454545	0.0880503	0.0645161		94	0.0567376	0.149254	0.0698925
95	0.0561798	0.1125	0.0416667		95	0.046875	0.057971	0.0724638		95	0.0669856	0.15748	0.0748899
96	0.0480769	0.121019	0.05		96	0.0396825	0.056	0.0714286		96	0.0604027	0.0666667	0.0662983
97	0.047619	0.156716	0.0531915		97	0.0510949	0.057971	0.0714286		97	0.0750988	0.075	0.0713636
98	0.0549451	0.0854701	0.0520833		98	0.048	0.0518519	0.0967742		98	0.0557491	0.274336	0.075
99	0.0707071	0.129496	0.0485437		99	0.0569106	0.0699301	0.0625		99	0.0571429	0.294798	0.0490566
100	0.05	0.0761905	0.0531915		100	0.0431655	0.0620155	0.0606061		100	0.0526316	0.0701754	0.0660377
